# Supplementary material for: Computer-assisted assessment of the Human Epidermal Growth Factor Receptor 2 immunohistochemical assay in imaged histologic sections using a membrane isolation algorithm and quantitative analysis of positive controls
Source: Springer Nature journal article supplement (doi:10.1186/1471-2342-8-11), 2008-06-05

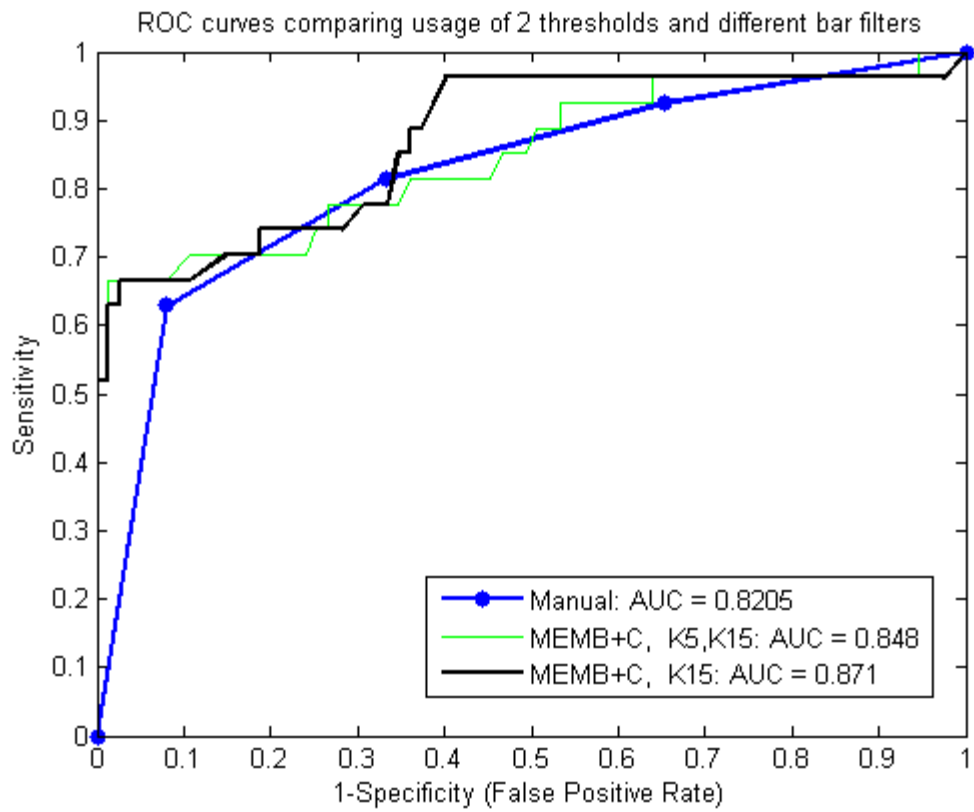

Supplement: 12880_2008_51_MOESM3_ESM.pdf [file 12880_2008_51_MOESM3_ESM.pdf]
